1     **Performance of an IAVI-African Network of Clinical Research Laboratories in**  
2     **Standardized ELISpot and Peripheral Blood Mononuclear Cell Processing in**  
3     **Support of HIV Vaccine Clinical Trials**

4     Robert Langat<sup>1,2#</sup>, Bashir Farah<sup>1</sup>, Jackton Indangasi<sup>1</sup>, Simon Ogola<sup>1</sup>, Gloria Omosa-  
5     Manyonyi<sup>1</sup>, Omu Anzala<sup>1</sup>, Jean Bizimana<sup>3</sup>, Emmanuel Tekirya<sup>3</sup>, Caroline Ngetsa<sup>4</sup>,  
6     Moses Silwamba<sup>5</sup>, Enoch Muyanja<sup>6</sup>, Paramesh Chetty<sup>7</sup>, Maureen Jangano<sup>8</sup>, Nancy  
7     Hills<sup>9</sup>, Jill Gilmour<sup>2</sup>, Len Dally<sup>11</sup>, Josephine H. Cox<sup>12</sup> and Peter Hayes<sup>2</sup>

8     <sup>1</sup> Kenya AIDS Vaccine Initiative -Institute of Clinical Research, University of Nairobi,  
9     Nairobi, Kenya, <sup>2</sup>International AIDS Vaccine Initiative (IAVI) Human Immunology  
10    Laboratory, Imperial College, London, United Kingdom, <sup>3</sup>Projet San Francisco, Kigali,  
11    Rwanda, <sup>4</sup>Kenya Medical Research Institute Centre for Geographical Medicine  
12    Research Coast, Kilifi, Kenya, <sup>5</sup>Zambia EMORY HIV Research Project, Lusaka,  
13    Zambia, <sup>6</sup>Ugandan Virus Research Institute-IAVI, Entebbe, Uganda,  
14    <sup>7</sup>IAVI,Johannesburg, South Africa, <sup>8</sup>Clinical Laboratory Services, Johannesburg,  
15    South Africa,<sup>9</sup>University of California, San Francisco, <sup>10</sup>International AIDS Vaccine  
16    Initiative, New York, New York, United States of America,<sup>11</sup>Emmes Corporation,  
17    Rockville Maryland, USA <sup>12</sup>Clinical Trials Program, Vaccine Research Center,  
18    National Institutes of Health, Bethesda, MD, USA

19

20    #Address correspondence to Robert Langat, [r.langat16@imperial.ac.uk](mailto:r.langat16@imperial.ac.uk)

21

22    Running title: PBMC processing and ELISpot proficiency testing

23

24 **Abstract**

25 Immunological assays performed in different laboratories participating in multi-centre  
26 clinical trials must be standardized in order to generate comparable and reliable data. This  
27 entails standardized procedures for sample collection, processing, freezing and storage.  
28 The International AIDS Vaccine Initiative (IAVI) partnered with local institutions to  
29 establish Good Clinical Laboratory Practice (GCLP)-accredited laboratories to support  
30 clinical trials in Africa, Europe and Asia. Here we report on the performance of seven  
31 laboratories based in Africa and Europe in the interferon-gamma enzyme-linked  
32 immunospot (IFN- $\gamma$  ELISpot) assay and peripheral blood mononuclear cell (PBMC)  
33 processing over four years. Characterized frozen PBMC samples from 48 volunteer blood  
34 packs processed at a central laboratory were sent to participating laboratories. For each  
35 stimulus, there were 1751 assays performed over four years. 98% of these ELISpot data  
36 were within acceptable ranges with low responses to mock stimuli. There were no  
37 significant differences in ELISpot responses at five laboratories actively conducting  
38 immunological analyses in support of IAVI sponsored clinical trials or HIV research. In a  
39 separate study, 1,297 PBMC samples isolated from healthy HIV-1 negative participants in  
40 clinical trials of two prophylactic HIV vaccine candidates were analysed for PBMC yield  
41 from fresh blood and cell recovery and viability following freezing and thawing. 94 % and  
42 96 % of samples had fresh PBMC viabilities and cell yields within the pre-defined  
43 acceptance criteria while for frozen PBMC, 99 % and 96 % of samples had acceptable  
44 viabilities and cell recoveries respectively, along with acceptable ELISpot responses in  
45 95%. These findings demonstrate the competency of laboratories across different  
46 continents to generate comparable and reliable data in support of clinical trials.

47

48

49 **Importance.**

50

51 There is a need for the establishment of an African network of laboratories to support  
52 large clinical trials across the continent to support and further the development of  
53 vaccine candidates against emerging infectious diseases such as Ebola, Zika and  
54 dengue viruses and the continued HIV-1 pandemic. This is particularly true in sub-  
55 Saharan Africa where the HIV-1 pandemic is most severe. In this report we have  
56 demonstrated by using standardized SOPs, training, equipment and reagents that  
57 GCLP-accredited clinical trial laboratories based in Africa and Europe can process  
58 clinical trial samples and maintain cell integrity and functionality demonstrated by  
59 IFN- $\gamma$  ELISpot testing, producing comparable and reliable data.

60

61

62

63

64

65

66

67

68

69

70

71

## 72 **Introduction**

73 Clinical trials related to HIV, malaria and tuberculosis (TB) have been conducted in Africa  
74 for decades (1-4). In order to harmonize the immunological data generated from these  
75 clinical trials, laboratories responsible for clinical sample processing must establish  
76 standardized procedures to meet International Conference on Harmonization (ICH) Good  
77 Clinical Practice (GCP) and World Health Organisation (WHO) guidelines for collection,  
78 processing and storage of samples and for immunological assays. The International AIDS  
79 Vaccine Initiative (IAVI) has partnered with local institutions and established Good Clinical  
80 Laboratory Practice (GCLP)-compliant laboratories across Africa, Europe and India to  
81 conduct safety and immunogenicity assessments in support of clinical trials of HIV  
82 vaccine candidates (5, 6). These laboratories are equipped to process and store samples  
83 for later testing and are able to perform ELISpot and flow cytometry immunological  
84 assays. IAVI has conducted over 20 phase 1 HIV vaccine trials ([www.iavi.org/trials-](http://www.iavi.org/trials-database)  
85 [database](http://www.iavi.org/trials-database)), with the majority in Africa (7-10). To ensure uniformity of data, IAVI sponsored  
86 a central laboratory at Imperial College London (Human Immunology Laboratory) to  
87 provide Standardised Operating Procedures (SOPs), training, critical assay reagents,  
88 long-term centralised sample storage and to perform immunological assays where local  
89 laboratories have no capability. IAVI and partners have developed the capacity of local  
90 personnel professionally and academically, through technical training, mentoring and  
91 funding for investigator-initiated research projects. These GCLP-accredited-laboratories  
92 have also been used as reference laboratories allowing local (and International) research  
93 organizations to utilize existing facilities for their research and staff training in technical  
94 assays and GCLP guidelines.

95 The performance of the IFN- $\gamma$  ELISpot assay across multiple laboratories both within and  
96 across continents is critical to the generation of standardized data on vaccine

97 immunogenicity (11). Previous studies (12) showed varied responses across laboratories  
98 while more recent ELISpot proficiency studies (13-15) have shown significantly improved  
99 results. These recent findings demonstrated that GCLP-accredited laboratories  
100 participating in proficiency testing over time can generate highly concordant results.

101 The majority of laboratories performing end-point ELISpot assays and enrolled in ELISpot  
102 proficiency schemes are based in Europe and USA (12, 15, 16). With increased focus on  
103 testing HIV vaccine products where the pandemic is most severe and with renewed  
104 interest in many “orphan” tropical infectious diseases (17), development of laboratory  
105 networks able to support large clinical trials across sub-Saharan Africa has gained  
106 importance. In order for IAVI-supported laboratories to meet international standards, they  
107 were enrolled into an IAVI-sponsored ELISpot proficiency scheme organised by Clinical  
108 Laboratory Services, South Africa.

109

110

111

112

113

114

115

116

117

118

## 119 **Methods and Materials**

### 120 **Participating laboratories**

121 All participants were IAVI-supported laboratories including: 1) Kenya AIDS Vaccine  
122 Initiative-Institute of Clinical Research (KAVI-ICR) University of Nairobi, Nairobi, Kenya; 2)  
123 IAVI Human Immunology Laboratory (HIL), Imperial College London, United Kingdom; 3)  
124 Uganda Virus Research Institute (UVRI)-IAVI, Entebbe, Uganda; 4) Clinical Laboratory  
125 Services (CLS), Witwatersrand University, Johannesburg, South Africa; 5) Kenya Medical  
126 Research Institute Centre for Geographical Medicine Research Coast (KEMRI-CGMRC),  
127 Kilifi, Kenya; 6) Zambia EMORY HIV Research Project (ZEHRP), Lusaka, Zambia; and 7)  
128 Projet San Francisco (PSF), Kigali, Rwanda. The laboratories were located in six countries  
129 (Kenya, Uganda, Rwanda, Zambia, South Africa and UK). CLS is not supported by IAVI but  
130 provide PBMC, pretesting and shipping services for the ELISpot proficiency testing. CLS  
131 participate in quarterly testing of the ELISpot proficiency and are included in this analysis.

### 132 **Laboratory Preparation**

#### 133 **Process of establishing clinical trial laboratories under GCLP guidelines**

134  
135 Comprehensive training programs, standardized GCLP-compliant serviced and calibrated  
136 equipment and quality control (QC) measures were integral to establishing IAVI's  
137 laboratories. The key elements for establishing the clinical trial laboratories are shown in  
138 **Table 1** and described in detail in the Supplementary Information.

139 The quality systems and SOPs were designed to minimise failure, identify problems, initiate  
140 corrective actions and monitor resolutions. Two laboratories (HIL and CLS) have been  
141 designated as support and QC management. London (United Kingdom) and Johannesburg  
142 (South Africa) were ideal locations to support a global clinical trial program. Both are major

143 international hubs in Europe and Africa, with direct flights to and from the above IAVI-  
144 supported laboratories, thereby reducing time, cost and risk to samples in transit.

145

#### 146 **ELISpot proficiency panel design**

147 IAVI–GCLP laboratories were enrolled in an ELISpot proficiency scheme coordinated by  
148 CLS, South Africa. At CLS, PBMC samples from 48 volunteer blood packs were processed  
149 and shipped to IAVI-supported laboratories for assessment of cell viability and IFN- $\gamma$  ELISpot  
150 responses. Two peptide pools were used; a pool of 32 8–10mer peptides representing  
151 immunodominant CD8+ T-cell epitopes from Cytomegalovirus, Epstein Barr virus and  
152 Influenza virus (CEF) (18) and a pool of 138 15mer peptides overlapping by 11 amino acids  
153 spanning the human Cytomegalovirus (CMV) pp65 protein at a final assay concentration of  
154 1.5  $\mu\text{g}/\text{mL}$  per peptide. A positive control of phytohaemagglutinin (PHA-L; Sigma L4144) at  
155 10 $\mu\text{g}/\text{mL}$  and a mock stimulus (medium / dimethyl sulfoxide (DMSO) alone) were used.

#### 156 **PBMCs for ELISpot Proficiency**

157 Each ELISpot proficiency panel consisted of 6 PBMC samples sufficient for monthly testing  
158 of the same 6 samples for 6 months at all laboratories. Different PBMC batches were  
159 provided from CLS each 6-month period over four years as shown in Figure 1. Four  
160 laboratories; KAVI-ICR, UVRI-IAVI, PSF-Kigali and the HIL actively performing  
161 immunological assays in support of IAVI clinical trials, conducted monthly ELISpot testing  
162 while 3 laboratories; KEMRI-CGMRC, ZEHRP and CLS not actively performing  
163 immunological assays conducted quarterly ELISpot testing. Raw ELISpot data were  
164 submitted to the IAVI HIL central data repository for evaluation of responses and results  
165 posted onto an access-restricted CLS website.

166

167

168 **Sample preparation and immunological assessment**

169 Minimal Information About T-cell Assays (MIATA) guidelines were followed for transparent  
170 reporting on immunological assays (19).

171 **PBMCs and clinical trial samples:** PBMCs used in ELISpot proficiency testing were  
172 prepared by Ficoll density centrifugation of buffy coats obtained from 48 healthy, HIV-1  
173 negative blood donors (South African National Blood Bank, Johannesburg, South Africa).  
174 Clinical trial samples were obtained from heparinized blood from healthy HIV-1 negative  
175 placebo and vaccine recipients participating in clinical trials of two prophylactic HIV vaccine  
176 candidates at KAVI-ICR, UVRI-IAVI, PSF and ZEHRP (8, 10). Isolated PBMCs had to meet  
177 the following pre-defined acceptance criteria: 1) viability above 90% and cell yield greater  
178 than  $0.7 \times 10^6$  PBMC/mL blood for freshly isolated PBMCs, 2) viability above 80% for frozen  
179 PBMCs following thaw and overnight rest and 3) processing of PBMCs from blood draw to  
180 start of freezing to be completed within 6 hours. Cell counts and viabilities were determined  
181 using a Vi-Cell XR (Beckman Coulter, UK) automated cell counter. PBMCs were frozen in  
182 freezing media containing 10% DMSO diluted in fetal calf serum (FCS) using a rate-  
183 controlled freezer (Planer, Sunbury-On-Thames, UK) which lowered the temperature by 1°C  
184 per minute from +4°C to -80°C then 10°C per minute to -120°C, before transfer to vapour  
185 phase liquid nitrogen (LN) until assayed. PBMC for ELISpot proficiency were stored in  
186 vapour-phase liquid nitrogen prior to shipment to participating laboratories using  
187 temperature-monitored cryogenic dry shippers (MVE Jencons, United Kingdom). The  
188 shippers were calibrated according to an SOP. Briefly, empty dry shippers were pre-weighed  
189 before filling with LN then left overnight for adsorption of LN and decanted the following day.  
190 Shipper weight loss and temperatures were recorded over the next 5 days. The dry shippers



191 were also fitted with the temperature loggers where temperature data were downloaded  
192 upon receipt of the dry shippers at the participating laboratories. In order for the dry shippers  
193 to pass the calibration, the average 24-hour weight loss over the 5-day calibration was  
194 0.6kg+/-10% and temperature <-190°C. Following receipt, PBMC were transferred to vapour-  
195 phase liquid nitrogen until assayed.

196 **IFN- $\gamma$  ELISpot Assay:** Cell recovery and viability of samples thawed and rested overnight for  
197 ELISpot testing were analysed. PBMCs were removed from LN storage and transported to  
198 the laboratory in dry ice and immediately immersed in a 37°C water bath until a small amount  
199 of ice remained. Cells were transferred to 10mL cell culture medium (RPMI 1640  
200 supplemented with 10% heat-inactivated FCS, 1 mM L-glutamine, 100 units/mL penicillin,  
201 100  $\mu$ g/mL streptomycin, 1mM sodium pyruvate and 0.5 mM HEPES (R10)), centrifuged at  
202 250g/10 mins, supernatants decanted, cell pellets disrupted and resuspended in 4mL RPMI  
203 1640 supplemented with 20% heat-inactivated FCS, 1 mM L-glutamine, 100 units/mL  
204 penicillin, 100  $\mu$ g/mL streptomycin, 1mM sodium pyruvate and 0.5 mM HEPES (R20). Cells  
205 were transferred to wells of 24 well culture plates in a 37°C /5% CO<sub>2</sub> incubator overnight. The  
206 following day, cells were recovered and washed in 10mL R10, supernatants decanted, 1mL  
207 of R10 added and cells counted.

208 RPMI 1640, L-glutamine, HEPES, penicillin/streptomycin, sodium pyruvate and heat-  
209 inactivated FCS were all purchased from Sigma-Aldrich (St Louis/Missouri, USA). All  
210 laboratories used the same batch of FCS for PBMC isolation and ELISpot assay, which was  
211 pretested for acceptable performance in procedures for PBMC isolation, freezing, recovery  
212 from frozen and low background (mock) and acceptable PHA/CMV responses in ELISpot.  
213 PVDF membrane plates were obtained from Millipore (MSIPS4510; United Kingdom). Anti-  
214 human IFN- $\gamma$  antibody (clone 1-D1K, 1 mg/mL) and biotinylated anti-human IFN- $\gamma$  antibody  
215 (clone 7-B6-1, 1 mg/mL) were purchased from Mabtech, Sweden; peroxidase-avidin biotin

216 complex (ABC) from Vector Laboratories, Burlingame, CA, USA; dimethylformamide (DMF)  
217 from VWR International, USA; PHA, 3-amino-9-ethylcarbazole (AEC) tablets (A6926), acetic  
218 acid, sodium acetate, 30% hydrogen peroxide ( $H_2O_2$ ) and sterile tissue culture water and  
219 phosphate-buffered saline (PBS) were all purchased from Sigma-Aldrich. CEF and CMV  
220 pp65 peptides were purchased from Anaspec Inc., CA, USA.

221 Prior to setting up each ELISpot assay, PVDF plates were treated with 50 $\mu$ L of 70% ethanol  
222 for 2 minutes, washed three times with 200  $\mu$ L/well sterile PBS, coated with 100 $\mu$ L/well of  
223 anti-human IFN- $\gamma$  (1-D1K, 10  $\mu$ g/mL in PBS) and stored overnight at 4°C. Plates were  
224 washed three times with 200  $\mu$ L/well sterile PBS, blocked for a minimum of 2 hours with 200  
225  $\mu$ L/well R10 at 37°C, 5% CO<sub>2</sub> incubator. The blocking medium was removed and 100  $\mu$ L/well  
226 of R10-diluted mock, CEF/CMV peptides (2.25  $\mu$ g/mL) and PHA (15  $\mu$ g/mL) were added to  
227 their respective wells (following a designated plate plan). 100  $\mu$ L CMV peptide was added to  
228 a designated no cell well. Thawed and overnight-rested PBMC were added at 200,000 cells  
229 in 50  $\mu$ L R10 to each well, with each sample and condition plated in quadruplicate. The  
230 plates were incubated for 16-24 hours (37°C, 5% CO<sub>2</sub>). The following day, cells were  
231 removed and plates washed six times with 200  $\mu$ L/well PBS with 0.05% tween (PBS/T) using  
232 an automated ELISA washer (Bio-Tek Instruments Inc., Winooski, VT, USA). 100  $\mu$ L  
233 biotinylated anti-human IFN- $\gamma$  antibody (7-B6-1, 1  $\mu$ g/mL in PBS with 0.1% BSA) were added  
234 for two hours at room temperature (RT). Plates were washed six times as above before  
235 addition of 100  $\mu$ L/well peroxidase avidin-biotin complex (per manufacturer's instructions), for  
236 one-hour at RT. Plates were washed three times with 200  $\mu$ L/well PBS/T followed by three  
237 washes with 200  $\mu$ L/well PBS. 100  $\mu$ L/well of 0.45 $\mu$ m filtered AEC substrate (AEC tablet  
238 dissolved in 2.5mL DMF, added to 47mL sterile tissue culture water containing 280 $\mu$ L 2M  
239 acetic acid and 180 $\mu$ L 2M sodium acetate and finally 25 $\mu$ L  $H_2O_2$  added) was added for 4 min  
240 at RT. Plates were emptied thoroughly and the reaction stopped under gently-running tap

241 water and the underdrain removed before leaving the plates to dry overnight protected from  
242 light. The acceptance criteria for the IFN- $\gamma$  ELISpot was the mock wells should have less  
243 than 10 spots per well and the peptide/media alone (no cells) 5 or fewer spots per well.

244 **Data Acquisition and Analysis:** Spots were evaluated with an AID reader system  
245 (AutoImmun Diagnostika, Germany) with software version 4.0. Each laboratory used the  
246 same model of AID reader and defined spot parameters. Responses are expressed as spot-  
247 forming cells (SFC) per  $10^6$  viable PBMCs as shown in **Figure 6**.

248 Our main outcomes included 1) the recovery and viability rates of frozen PBMCs, 2) ELISpot  
249 results compared to mock, CMV and CEF stimuli and 3) comparison of ELISpot results  
250 across laboratories. For each peptide repeated measures, Poisson regression model was fit  
251 on background-subtracted count (except mock), with counts from the same volunteer  
252 assumed to be correlated. The resulting least squares parameter estimates are presented  
253 together with their 95% confidence intervals adjusted for multiple comparisons using the  
254 Bonferroni method. Each model included volunteer, laboratory and month. Pair-wise  
255 comparisons between laboratories are shown as the ratio of the least squares estimates of  
256 mean count with corresponding adjusted (Bonferroni) 95% confidence interval. Statistical  
257 significance is defined as a 95% CI for the ratio that excludes unity (i.e., entirely above or  
258 below the value 1). Figures 1, 4 and 5 were generated by Graph Pad prism software version  
259 7.01. Other figures and statistical analyses were performed using SAS Version 9.3.

## 260 **Results**

### 261 **1. Performance in ELISpot assay across 7 laboratories**

262 Each assay included 4 replicates for each peptide. Results based on less than 4 replicates  
263 were assumed to be less reliable and excluded from analysis. For each peptide and mock  
264 stimulus there were 1751 assays performed of which 50 were excluded (i.e., about 2.9%).

265 The distribution of mock, CMV and CEF responses across laboratories over time is shown in  
266 **Figure 1A & B**. To compare ELISpot data across the 7 laboratories, the response was  
267 background-subtracted counts (except mock). The covariates in the model were sample,  
268 laboratory and month.

269 Across the seven laboratories, the geometric mean ELISpot counts (SFC/ $10^6$  PBMC) were 6  
270 – 10 for Mock, 289 – 438 for CEF and 172 – 266 for CMV (**S1A, S2A & S3A Tables**  
271 **respectively**).

272 Statistical differences were observed between laboratories in mock counts as shown in **S1B**  
273 **Table** and **Figure 2B** ( $p=0.0007$ ). For example, the mock count at CLS is estimated to be  
274 1.73 times the mock count at ZEHRP. Also, the mock count at PSF is 0.78 times lower than  
275 at UVRI-IAVI. ZEHRP tends to have lower mock counts than all other laboratories.

276 When comparing the responses against CEF peptides across laboratories, KEMRI-CGMRC  
277 had significantly higher counts than other laboratories ( $p=0.0045$ , **S2B Table & Figure 2B**).  
278 When data for KEMRI-CGMRC are excluded, the overall difference between laboratories is  
279 not statistically significant ( $p=0.11$ , **S2C Table**).

280  
281 When comparing the responses against CMV responses across laboratories, KEMRI-  
282 CGMRC again had significantly higher counts than other laboratories ( $p=0.012$ , **S3B Table &**  
283 **Figure 2B**). On excluding data for KEMRI-CGMRC the overall difference between  
284 laboratories is still statistically significant ( $p=0.033$ , **S3C Table**), due to the counts at ZEHRP  
285 being lower than CLS and KAVI-ICR.

286

287 **Inter-operator analysis**

288 ELISpot data from 3 operators at KAVI-ICR were compared. Samples from 12  
289 volunteers were analyzed by 3 operators on 2 occasions, each operator analyzing the  
290 same set of samples at the same monthly time points. ELISpot counts were obtained  
291 for mock and background-subtracted CMV and CEF peptide pools. The covariates in  
292 the model were sample, operator and month across the three operators, the  
293 geometric mean ELISpot counts (SFC/ $10^6$  PBMC) were 9 – 12 for Mock, 368 – 393  
294 for CEF and 538 – 598 for CMV (**S4A Table**). The differences between operators  
295 were not statistically significant (**S4B Table and Figure 3**).

296

## 297 **2. Viability and cell yield of freshly isolated PBMCs and recovery from frozen** 298 **PBMCs across 4 laboratories**

299 A total of 1297 PBMCs isolated from clinical trial samples were analysed for cell  
300 viability, recovery and cell yield in four laboratories supporting two IAVI-sponsored  
301 clinical trials. 1220 of 1297 (94%) freshly-isolated PBMCs had viabilities above 90%  
302 with a median of 95% (range 81-100%) while those below 90% had a median of 88%  
303 (range 81-90%, **Figure 4A**). Over 96% of these samples had cell yields greater than  
304  $0.7 \times 10^6$  PBMC/mL blood, within the pre-defined acceptability criteria with few  
305 samples having low cell yield ranging from  $0.13$ - $0.56 \times 10^6$  PBMC/mL blood (**Figure**  
306 **4B**). A total of 1205 of these samples were tested in ELISpot assay and almost all  
307 (99%) had viabilities above 80% following thaw and overnight rest (within  
308 acceptability criteria) with only 9 samples having viabilities below 80% ranging from  
309 66 to 78% as shown in **Figure 4C**. Cell recoveries for these samples were above  
310  $6.0 \times 10^6$  PBMC/vial (PBMCs were frozen at  $10$ - $15 \times 10^6$  PBMC/vial); data were  
311 normalized to 10 million cells as shown in **Figure 4D**. For all samples tested, cells  
312 were functional in ELISpot assay with over 95% of the samples having mock

313 responses  $<50$  SFC/ $10^6$  PBMC, PHA  $>1000$  SFC/ $10^6$  PBMC and a range of CMV  
314 responses.

315 The length of time from blood draw to sample processing and freezing has been  
316 shown to affect the integrity of PBMC (20-22). Nearly all of our samples were  
317 processed within 6 hours with 81 (6 %) processed beyond 6 hours (range 6.1-9.5  
318 hours, **Figure 4E & 5E**). To assess the impact of longer processing of these samples,  
319 the cell yields and viabilities from fresh blood were analysed together with cell  
320 recoveries and viabilities following freezing and thawing. All samples except one had  
321 freshly-isolated cell viabilities and cell yields within the acceptable range, that is  
322  $>90\%$  and  $>0.7 \times 10^6$  PBMC per mL blood respectively (**Figure 5A & B**). Only one  
323 sample had a slightly lower cell yield of  $0.57 \times 10^6$  per mL blood (98% viability). Post  
324 PBMC freezing cell viabilities ranged from 93-100% and recoveries above  $6 \times 10^6$   
325 PBMC/vial in 71/81 (87%) samples (**Figure 5C & D**). We further tested these  
326 samples in ELISpot assay to assess their cell functionality and all samples performed  
327 well with the mock responses  $<50$  SFC/ $10^6$  PBMC, PHA responses  $> 1000$  SFC/ $10^6$   
328 PBMC and a typical range of CMV responses indistinguishable from samples  
329 processed within 6 hours, as shown in **Figure 5F**.

330

331

332

333

334

335

336

337

338

## 339 **Discussion**

340 This report compares data generated across a network of 7 IAVI-supported GCLP-  
341 accredited clinical trial laboratories based in Africa and Europe. These laboratories  
342 were assessed on ELISpot proficiency testing and PBMC processing.

343 ELISpot proficiency data were analysed and compared across and within sites.  
344 Acceptability criteria for mock and PHA controls and CMV and CEF responses had  
345 to be clearly positive or negative during pre-testing. We found that all laboratories  
346 correctly detected responses against CMV and CEF peptide stimuli with the  
347 exception of a few sporadic higher data points in mock stimulus which was seen  
348 across laboratories. As expected even for technically competent laboratories there  
349 were occasional discrepant data points.

350 In this report we have demonstrated that ELISpot data for CEF and CMV responses  
351 from 5 laboratories were not significantly different and were overall comparable. Four  
352 of these laboratories were actively performing ELISpot analysis in support of IAVI  
353 clinical trials whilst a fifth laboratory (CLS) performed ongoing ELISpot analyses as  
354 part of establishing the proficiency scheme and in training of staff at other  
355 laboratories. We did observe significantly different data for CEF and CMV  
356 responses from 2 laboratories that were not routinely conducting ELISpot assay in  
357 support of IAVI clinical trials when compared to the other laboratories. Staff at these  
358 laboratories only performed ELISpot analyses as part of the proficiency program  
359 described in this report and therefore would have less ongoing technical experience

360 in ELISpot analysis compared to staff at laboratories with active participation in  
361 clinical trials. To mitigate this, staff at the 2 laboratories were retrained and  
362 competency assessed. This highlights the need for review of staff retraining and  
363 continual monitoring of laboratories' performance with trouble-shooting and staff  
364 training and re-training as required, especially for laboratories taking on new  
365 activities or trials or where laboratories have not performed certain techniques in a  
366 trial setting for some time. However, although the ELISpot responses observed at  
367 these 2 laboratories were statistically significantly different, the range of estimated  
368 least squares mean counts across the 7 laboratories was not high with 274 to 438 for  
369 CEF (**S2A Table**) and 172 to 266 SFC/10<sup>6</sup> PBMC for CMV (**S3A Table**). Statistically  
370 significant differences in mock values between laboratories were apparent which  
371 may be expected as in effect the vast majority of mock responses were close to  
372 zero. Across the seven laboratories, the geometric mean ELISpot mock counts were  
373 6 – 10 SFC/10<sup>6</sup> PBMC (**S1A Table**). High variability of low T cell responses has  
374 been reported previously (23).

375 Operator-dependent variability in ELISpot is a known phenomenon (24) and we  
376 assessed this in this report. It was not possible to analyse inter-operator variability at  
377 all laboratories as some laboratories had either a lone operator throughout, or a  
378 change of operators during the study period. However, we report on one laboratory  
379 with 3 operators performing the ELISpot assay on a rotational basis. All operators  
380 detected correctly the expected responses for CMV and CEF stimuli. Their data were  
381 highly correlated and variability in data points was not significantly different.

382 Achieving accurate and reliable results when assessing the immunogenicity of  
383 vaccine candidates, especially for multi-site clinical trials, is essential. In order to  
384 achieve this, samples must be processed according to standardised SOPs following



385 GCLP-guidelines for data integrity. PBMC processing in four clinical trial laboratories  
386 were analysed for processing time from blood draw to start of freezing, cell yield and  
387 viability and post-freezing viability and recovery. We report that the vast majority of  
388 freshly isolated PBMCs had viabilities and cell yields within the acceptable range  
389 across all laboratories.

390 Proper freezing and storage of samples is critical in preserving cell integrity and  
391 functionality (25). In this report we assessed the integrity of PBMCs processed and  
392 frozen at the laboratories. Cells were thawed at the HIL (Central repository lab) for  
393 ELISpot testing and nearly all samples had cell viabilities and recoveries within the  
394 acceptance criteria, with cell functionality demonstrated by good performance in  
395 ELISpot assay, therefore demonstrating the competency of laboratories in isolation,  
396 freezing, storing and shipping of PBMC samples.

397 PBMCs processed beyond 8 hours have been shown to have reduced cell viability  
398 and compromised cell functionality (26). Here, we report that the majority of samples  
399 were processed within 6 hours with the exception of few samples processed beyond  
400 6 hours, mainly due to delayed delivery to the laboratories from some clinics located  
401 up to 50 miles away. For samples processed beyond 6 hours, corrective and  
402 preventive action (CAPA) reports were written to minimise or prevent recurrence  
403 where possible and monitored on a monthly basis. Cell yields, viabilities and  
404 recoveries of these samples were assessed to determine the impact of longer  
405 processing on their integrity. All samples performed well in ELISpot with responses  
406 to Mock, CMV, CEF and PHA stimuli being in the expected ranges with data similar  
407 to samples processed within 6 hours. Therefore, we show that PBMCs processed  
408 longer than 6 hours (up to 9 hours) are still viable and functional in ELISpot assay  
409 and similar to what other groups have shown (20-21).

410 Participating laboratories are audited regularly for GCLP compliance by internal and  
411 external independent auditors. The audit covers SOPs, ELISpot and flow cytometry  
412 proficiency, external quality assurance programs and data integrity. The GCLP audit  
413 by an external auditor from Qualogy Ltd, UK is conducted annually with an  
414 accreditation certificate issued to compliant laboratories.

415 In conclusion, we have demonstrated that using standardised SOPs, equipment and  
416 reagents and working in a GCLP compliant laboratory, clinical trial laboratories  
417 located in Africa and Europe can process clinical trial samples and maintain cell  
418 integrity and functionality through ELISpot testing, producing comparable and  
419 reliable data.

420

## 421 **Acknowledgments**

422 We wish to acknowledge the support from the University of California, San  
423 Francisco's (UCSF) International Traineeships in AIDS Prevention Studies (ITAPS),  
424 U.S. NIMH, R25 MH064712 under which this manuscript was written. We thank  
425 UCSF faculty staff for helpful discussions, Matt Price and Kathy Crisafi of IAVI for  
426 manuscript review and laboratory technicians for experimental assistance. We also  
427 thank all IAVI-Clinical Research Centres' Principal Investigators for overseeing the  
428 laboratories. This work was funded in part by IAVI and made possible by the support  
429 of the United States Agency for International Development (USAID) and other  
430 donors. The full list of IAVI donors is available at [www.iavi.org](http://www.iavi.org). The contents of this  
431 manuscript are the responsibility of the authors and do not necessarily reflect the  
432 views of USAID or the US Government.

433



435 **References**

- 436 1. Gilmour JW, Stevens WS, Gray C, de Souza M. 2007. Laboratory expansion  
437 to large-scale international HIV preventive vaccine trials. *Curr Opin HIV AIDS*  
438 2:201-6.
- 439 2. Kublin JG, Morgan CA, Day TA, Gilbert PB, Self SG, McElrath MJ, Corey L.  
440 2012. HIV Vaccine Trials Network: activities and achievements of the first  
441 decade and beyond. *Clin Investig (Lond)* 2:245-254.
- 442 3. Muyanja E, Ssemaganda A, Ngauv P, Cubas R, Perrin H, Srinivasan D,  
443 Canderan G, Lawson B, Kopycinski J, Graham AS, Rowe DK, Smith MJ, Isern  
444 S, Michael S, Silvestri G, Vanderford TH, Castro E, Pantaleo G, Singer J,  
445 Gilmour J, Kiwanuka N, Nanvubya A, Schmidt C, Birungi J, Cox J, Haddad  
446 EK, Kaleebu P, Fast P, Sekaly RP, Trautmann L, Gaucher D. 2014. Immune  
447 activation alters cellular and humoral responses to yellow fever 17D vaccine.  
448 *J Clin Invest* 124:3147-58.
- 449 4. Schmidt C, Jaoko W, Omosa-Manyonyi G, Kaleebu P, Mpendo J, Nanvubya  
450 A, Karita E, Bayingana R, Bekker LG, Chomba E, Kilembe W, Nchabeleng M,  
451 Nyombayire J, Stevens G, Chetty P, Lehrman J, Cox J, Allen S, Dally L, Smith  
452 C, Fast PE. 2014. Long-term follow-up of study participants from prophylactic  
453 HIV vaccine clinical trials in Africa. *Hum Vaccin Immunother* 10:714-23.
- 454 5. Sarzotti-Kelsoe M, Cox J, Cleland N, Denny T, Hural J, Needham L, Ozaki D,  
455 Rodriguez-Chavez IR, Stevens G, Stiles T, Tarragona-Fiol T, Simkins A.  
456 2009. Evaluation and recommendations on good clinical laboratory practice  
457 guidelines for phase I-III clinical trials. *PLoS Med* 6:e1000067.

- 458 6. Stiles T, Grant V, Mawbey T. 2010. Good Clinical Laboratory Practice  
459 (GCLP). A quality system for laboratories that undertake the analysis of  
460 samples from clinical trials. BARQA ISBN 978-1-904610-00-7.
- 461 7. Baden LR, Karita E, Mutua G, Bekker LG, Gray G, Page-Shipp L, Walsh SR,  
462 Nyombayire J, Anzala O, Roux S, Laher F, Innes C, Seaman MS, Cohen YZ,  
463 Peter L, Frahm N, McElrath MJ, Hayes P, Swann E, Grunenberg N, Grazia-  
464 Pau M, Weijtens M, Sadoff J, Dally L, Lombardo A, Gilmour J, Cox J, Dolin R,  
465 Fast P, Barouch DH, Laufer DS, Group BIHS. 2016. Assessment of the Safety  
466 and Immunogenicity of 2 Novel Vaccine Platforms for HIV-1 Prevention: A  
467 Randomized Trial. *Ann Intern Med* 164:313-22.
- 468 8. Mpendo J, Mutua G, Nyombayire J, Ingabire R, Nanvubya A, Anzala O, Karita  
469 E, Hayes P, Kopycinski J, Dally L, Hannaman D, Egan MA, Eldridge JH,  
470 Syvertsen K, Lehrman J, Rasmussen B, Gilmour J, Cox JH, Fast PE, Schmidt  
471 C. 2015. A Phase I Double Blind, Placebo-Controlled, Randomized Study of  
472 the Safety and Immunogenicity of Electroporated HIV DNA with or without  
473 Interleukin 12 in Prime-Boost Combinations with an Ad35 HIV Vaccine in  
474 Healthy HIV-Seronegative African Adults. *PLoS One* 10:e0134287.
- 475 9. Mutua G, Farah B, Langat R, Indangasi J, Ogola S, Onsembe B, Kopycinski  
476 JT, Hayes P, Borthwick NJ, Ashraf A, Dally L, Barin B, Tillander A, Gilmour J,  
477 De Bont J, Crook A, Hannaman D, Cox JH, Anzala O, Fast PE, Reilly M,  
478 Chinyenze K, Jaoko W, Hanke T, Hiv-Core 004 Study Group T. 2016. Broad  
479 HIV-1 inhibition in vitro by vaccine-elicited CD8(+) T cells in African adults.  
480 *Mol Ther Methods Clin Dev* 3:16061.
- 481 10. Omosa-Manyonyi G, Mpendo J, Ruzagira E, Kilembe W, Chomba E, Roman  
482 F, Bourguignon P, Koutsoukos M, Collard A, Voss G, Laufer D, Stevens G,

- 483 Hayes P, Clark L, Cormier E, Dally L, Barin B, Ackland J, Syvertsen K,  
484 Zachariah D, Anas K, Sayeed E, Lombardo A, Gilmour J, Cox J, Fast P,  
485 Priddy F. 2015. A Phase I Double Blind, Placebo-Controlled, Randomized  
486 Study of the Safety and Immunogenicity of an Adjuvanted HIV-1 Gag-Pol-Nef  
487 Fusion Protein and Adenovirus 35 Gag-RT-Int-Nef Vaccine in Healthy HIV-  
488 Uninfected African Adults. PLoS One 10:e0125954.
- 489 11. Klausner RD, Fauci AS, Corey L, Nabel GJ, Gayle H, Berkley S, Haynes BF,  
490 Baltimore D, Collins C, Douglas RG, Esparza J, Francis DP, Ganguly NK,  
491 Gerberding JL, Johnston MI, Kazatchkine MD, McMichael AJ, Makgoba MW,  
492 Pantaleo G, Piot P, Shao Y, Tramont E, Varmus H, Wasserheit JN. 2003.  
493 Medicine. The need for a global HIV vaccine enterprise. Science 300:2036-9.
- 494 12. Cox JH, Ferrari G, Kalams SA, Lopaczynski W, Oden N, D'Souza M P, Elispot  
495 Collaborative Study G. 2005. Results of an ELISPOT proficiency panel  
496 conducted in 11 laboratories participating in international human  
497 immunodeficiency virus type 1 vaccine trials. AIDS Res Hum Retroviruses  
498 21:68-81.
- 499 13. Boaz MJ, Hayes P, Tarragona T, Seamons L, Cooper A, Birungi J, Kitandwe  
500 P, Semaganda A, Kaleebu P, Stevens G, Anzala O, Farah B, Ogola S,  
501 Indangasi J, Mhlanga P, Van Eeden M, Thakar M, Pujari A, Mishra S,  
502 Goonetilleke N, Moore S, Mahmoud A, Sathyamoorthy P, Mahalingam J,  
503 Narayanan PR, Ramanathan VD, Cox JH, Dally L, Gill DK, Gilmour J. 2009.  
504 Concordant proficiency in measurement of T-cell immunity in human  
505 immunodeficiency virus vaccine clinical trials by peripheral blood mononuclear  
506 cell and enzyme-linked immunospot assays in laboratories from three  
507 continents. Clin Vaccine Immunol 16:147-55.

- 508 14. Gill DK, Huang YD, Levine GL, Sambor A, Carter DK, Sato A, Kopycinski J,  
509 Hayes P, Hahn B, Birungi J, Tarragona-Fiol T, Wan H, Randles M, Cooper  
510 AR, Ssemaganda A, Clark L, Kaleebu P, Self SG, Koup R, Wood B, McElrath  
511 MJ, Cox JH, Hural J, Gilmour J. 2010. Equivalence of ELISpot Assays  
512 Demonstrated between Major HIV Network Laboratories. *Plos One* 5:e14330.
- 513 15. Sanchez AM, Rountree W, Berrong M, Garcia A, Schuetz A, Cox J, Frahm N,  
514 Manak M, Sarzotti-Kelsoe M, D'Souza MP, Denny T, Ferrari G. 2014. The  
515 External Quality Assurance Oversight Laboratory (EQAPOL) proficiency  
516 program for IFN-gamma enzyme-linked immunospot (IFN-gamma ELISpot)  
517 assay. *J Immunol Methods* 409:31-43.
- 518 16. Rountree W, Vandergrift N, Bainbridge J, Sanchez AM, Denny TN. 2014.  
519 Statistical methods for the assessment of EQAPOL proficiency testing:  
520 ELISpot, Luminex, and Flow Cytometry. *J Immunol Methods* 409:72-81.
- 521 17. Liese BH, Houghton N, Teplitskaya L. 2014. Development assistance for  
522 neglected tropical diseases: progress since 2009. *Int Health* 6:162-71.
- 523 18. Currier JR, Kuta EG, Turk E, Earhart LB, Loomis-Price L, Janetzki S, Ferrari  
524 G, Birx DL, Cox JH. 2002. A panel of MHC class I restricted viral peptides for  
525 use as a quality control for vaccine trial ELISPOT assays. *Journal of*  
526 *Immunological Methods* 260:157-172.
- 527 19. Britten CM, Janetzki S, Butterfield LH, Ferrari G, Gouttefangeas C, Huber C,  
528 Kalos M, Levitsky HI, Maecker HT, Melief CJ, O'Donnell-Tormey J, Odunsi K,  
529 Old LJ, Ottenhoff TH, Ottensmeier C, Pawelec G, Roederer M, Roep BO,  
530 Romero P, van der Burg SH, Walter S, Hoos A, Davis MM. 2012. T cell  
531 assays and MIATA: the essential minimum for maximum impact. *Immunity*  
532 37:1-2.

- 533 20. Bull M, Lee D, Stucky J, Chiu YL, Rubin A, Horton H, McElrath MJ. 2007.  
534 Defining blood processing parameters for optimal detection of cryopreserved  
535 antigen-specific responses for HIV vaccine trials. *J Immunol Methods* 322:57-  
536 69.
- 537 21. Kierstead LS, Dubey S, Meyer B, Tobery TW, Mogg R, Fernandez VR, Long  
538 R, Guan L, Gaunt C, Collins K, Sykes KJ, Mehrotra DV, Chirmule N, Shiver  
539 JW, Casimiro DR. 2007. Enhanced rates and magnitude of immune  
540 responses detected against an HIV vaccine: effect of using an optimized  
541 process for isolating PBMC. *AIDS Res Hum Retroviruses* 23:86-92.
- 542 22. Mallone R, Mannering SI, Brooks-Worrell BM, Durinovic-Bello I, Cilio CM,  
543 Wong FS, Schloot NC, T-Cell Workshop Committee IoDS. 2011. Isolation and  
544 preservation of peripheral blood mononuclear cells for analysis of islet  
545 antigen-reactive T cell responses: position statement of the T-Cell Workshop  
546 Committee of the Immunology of Diabetes Society. *Clin Exp Immunol* 163:33-  
547 49.
- 548 23. Maecker HT, Rinfret A, D'Souza P, Darden J, Roig E, Landry C, Hayes P,  
549 Birungi J, Anzala O, Garcia M, Harari A, Frank I, Baydo R, Baker M, Holbrook  
550 J, Ottinger J, Lamoreaux L, Epling CL, Sinclair E, Suni MA, Punt K, Calarota  
551 S, El-Bahi S, Alter G, Maila H, Kuta E, Cox J, Gray C, Altfeld M, Nougarede  
552 N, Boyer J, Tussey L, Tobery T, Bredt B, Roederer M, Koup R, Maino VC,  
553 Weinhold K, Pantaleo G, Gilmour J, Horton H, Sekaly RP. 2005.  
554 Standardization of cytokine flow cytometry assays. *BMC Immunol* 6:13.
- 555 24. Janetzki S, Schaed S, Blachere NE, Ben-Porat L, Houghton AN, Panageas  
556 KS. 2004. Evaluation of Elispot assays: influence of method and operator on  
557 variability of results. *J Immunol Methods* 291:175-83.



- 558 25. Smith JG, Joseph HR, Green T, Field JA, Wooters M, Kaufhold RM, Antonello  
559 J, Caulfield MJ. 2007. Establishing acceptance criteria for cell-mediated-  
560 immunity assays using frozen peripheral blood mononuclear cells stored  
561 under optimal and suboptimal conditions. *Clin Vaccine Immunol* 14:527-37.
- 562 26. Olson WC, Smolkin ME, Farris EM, Fink RJ, Czarkowski AR, Fink JH,  
563 Chianese-Bullock KA, Slingluff CL, Jr. 2011. Shipping blood to a central  
564 laboratory in multicenter clinical trials: effect of ambient temperature on  
565 specimen temperature, and effects of temperature on mononuclear cell yield,  
566 viability and immunologic function. *J Transl Med* 9:26.

567

568

569

570

571

572

573

574

575

576

577

578

579

580

581

582

583

584

585

586 **Figures and Tables Legends**

587 **Figure 1. ELISpot spot forming cells (SFC) per million PBMC and variability**  
588 **across laboratories represented in *box plots*. A) years 1-2 and B) years 3-4.**

589 Each panel consists of the same 6 donor samples tested over a 6-month period by 7  
590 laboratories. Box plots represent the quartiles, horizontal line the median and  
591 whiskers represent the maximum and minimum values. Each point represents  
592 average SFC/ $10^6$  PBMC from replicates per donor at each laboratory. Laboratories  
593 are color-coded as follows: Red = KAVI-ICR, Blue = UVRI-IAVI, Green = PSF,  
594 Purple = ZEHRP, Yellow =KEMRI-CGMRC, Cyan =CLS and Black = HIL.

595

596 **Figure 2. Comparisons of PBMC ELISpot responses:** All pair-wise least squares  
597 means and their significance, on a natural log scale, for mock, CEF and CMV  
598 respectively. For each comparison a line segment, centred at the least squares-  
599 means in the pair, is drawn. The segment length corresponds to the projected width  
600 of a confidence interval for the least squares mean difference. Segments that fail to  
601 cross the 45° reference line correspond to significant least squares mean  
602 differences. The graph shows which site pairs are significantly different (blue lines)  
603 and which are not (red lines).

604

605 **Figure 3. Inter-operator ELISpot comparison from 3 operators at KAVI-ICR:** All  
606 pair-wise least squares means and their significance, on a natural log scale, for  
607 Mock, CEF and CMV respectively. For each comparison a line segment, centred at  
608 the lest squares-means in the pair, is drawn. The length of the segment corresponds  
609 to the projected width of a confidence interval for the least squares mean difference.  
610 Segments that fail to cross the 45° reference line correspond to significant least

611 squares mean differences. None of the pairs of operators are significantly different  
612 (all lines cross the 45-degree reference line).

613 **Figure 4. Cell recovery, viability and processing time of clinical trial samples:**  
614 **A)** viability of freshly isolated PBMC; **B)** cell yield per mL of blood; **C)** viability after  
615 overnight rest; **D)** cell recovery of PBMC frozen at  $10\text{-}15 \times 10^6$  PBMC per vial; data  
616 were normalized to 10 million cells; **E)** PBMC processing time. Each point in the  
617 scatter plot represents a sample and the lines represent the median with interquartile  
618 range. Horizontal lines show the acceptance cut-off.

619 **Figure 5. Cell recovery, viability and ELISpot responses of samples processed**  
620 **beyond 6 hours:** **A)** viability from freshly isolated PBMC; **B)** cell yield per mL blood;  
621 **C)** viability from frozen samples; **D)** cell recovery of PBMC per 10 million cells frozen  
622 following thaw and overnight rest; **E)** processing time from blood draw to freezing of  
623 PBMC; **F)** ELISpot responses of PBMC tested against mock, PHA and CMV stimuli  
624 for PBMCs processed within 6 hours (red) and beyond 6 hours (black). Each point in  
625 the scatter plot represents a sample and the median (horizontal line). Horizontal lines  
626 represent the acceptance cut-offs.

627 **Figure 6. PBMC ELISpot responses against CMV peptides.** Representative well  
628 images (plate wells C9 to C12) of the CMV responses for sample 3522 performed in  
629 quadruplicates across the laboratories. The SFC counted per well are given in each  
630 well image.

631

632

633

634

635 **Table 1:** Summary of the process of establishing clinical trial laboratories under

636 GCLP guidelines.

637

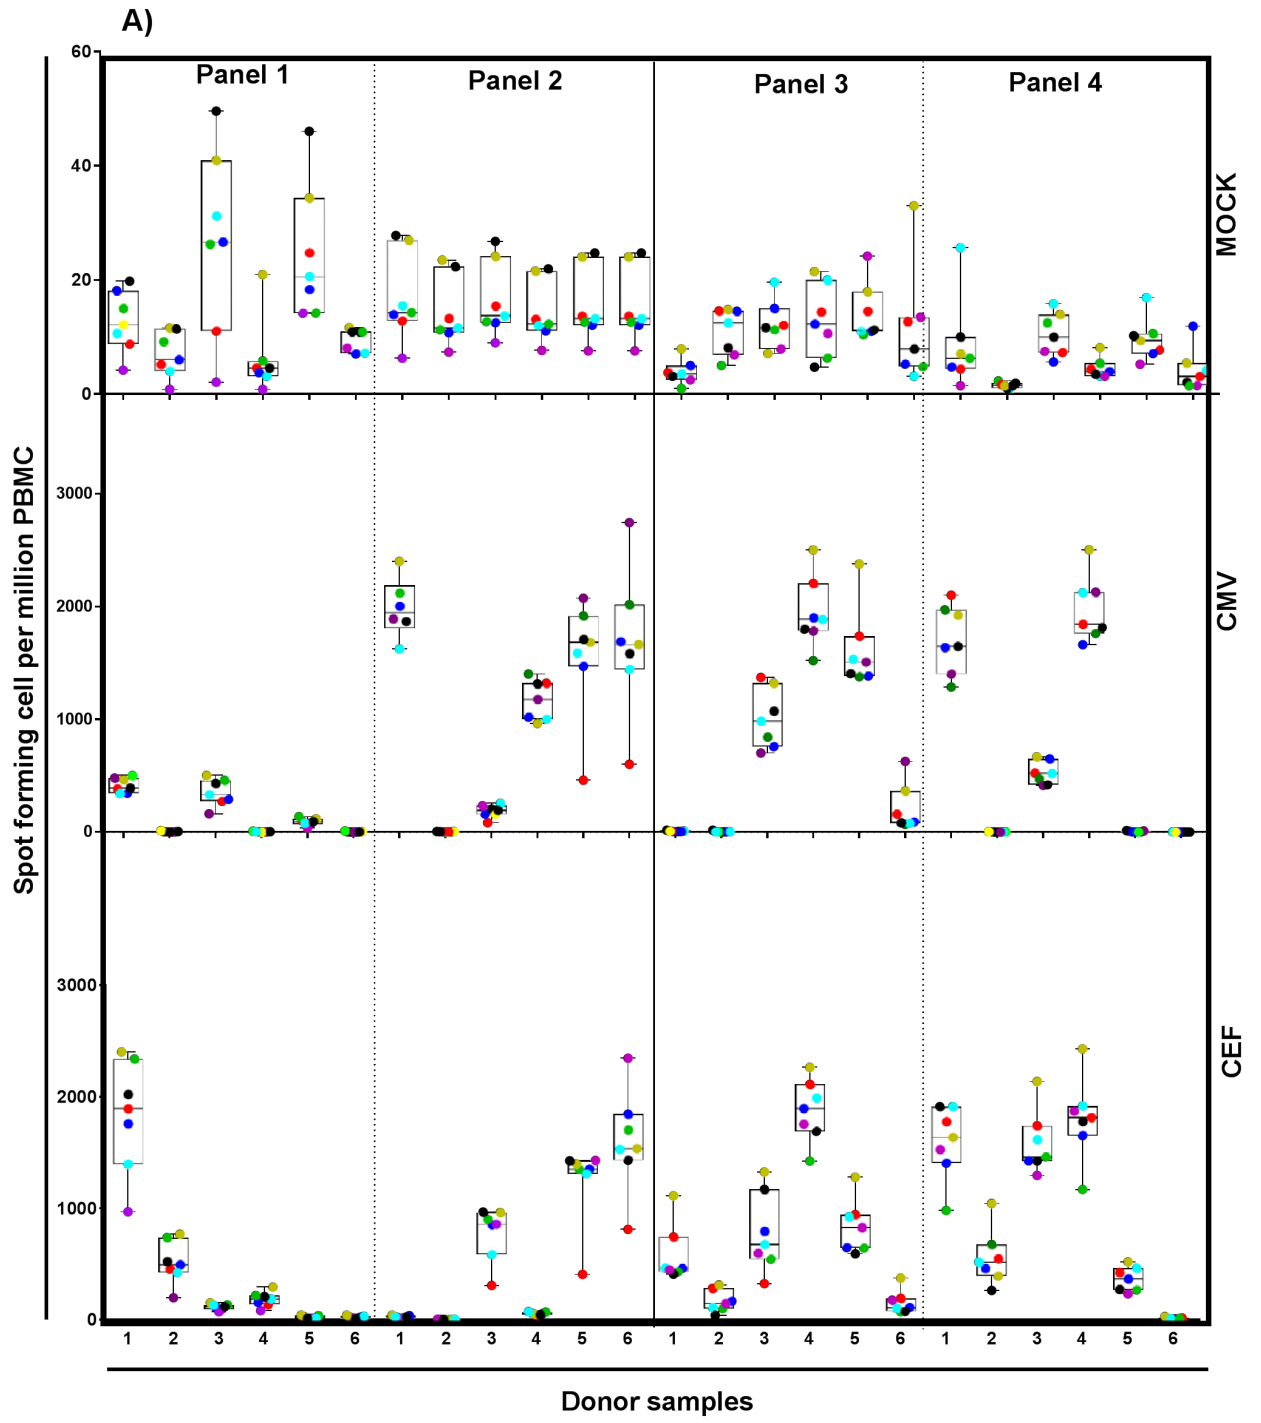

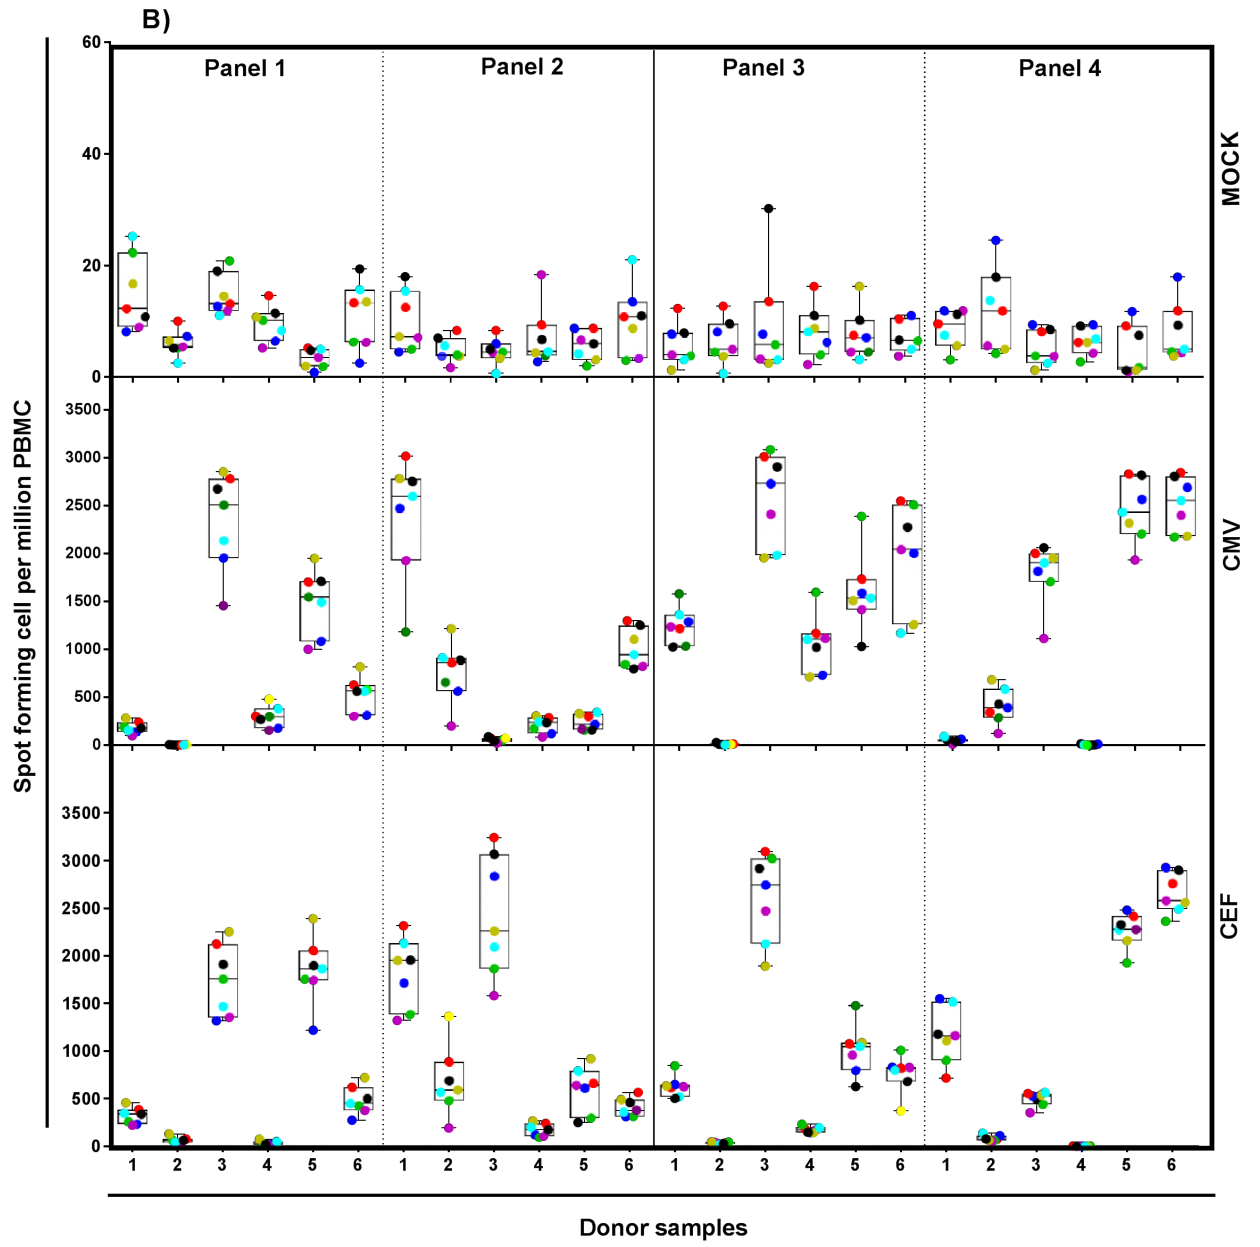

a. Mock

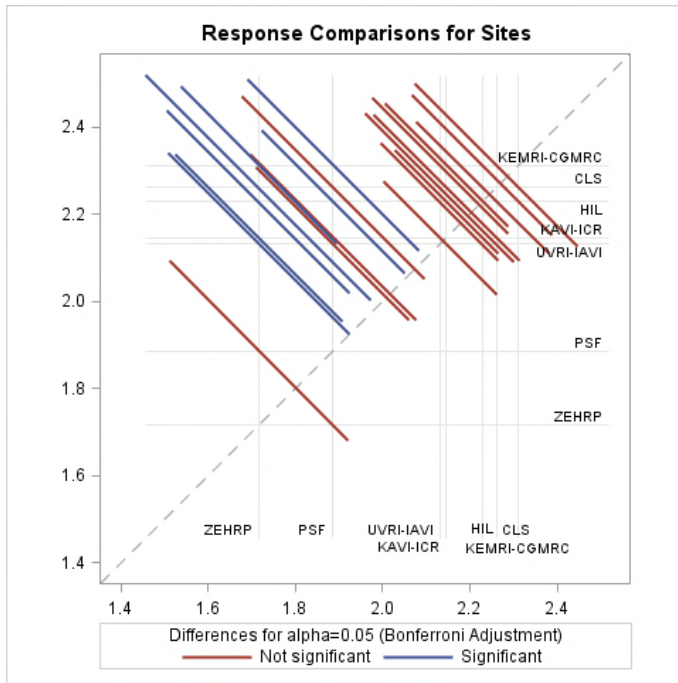

b. CEF

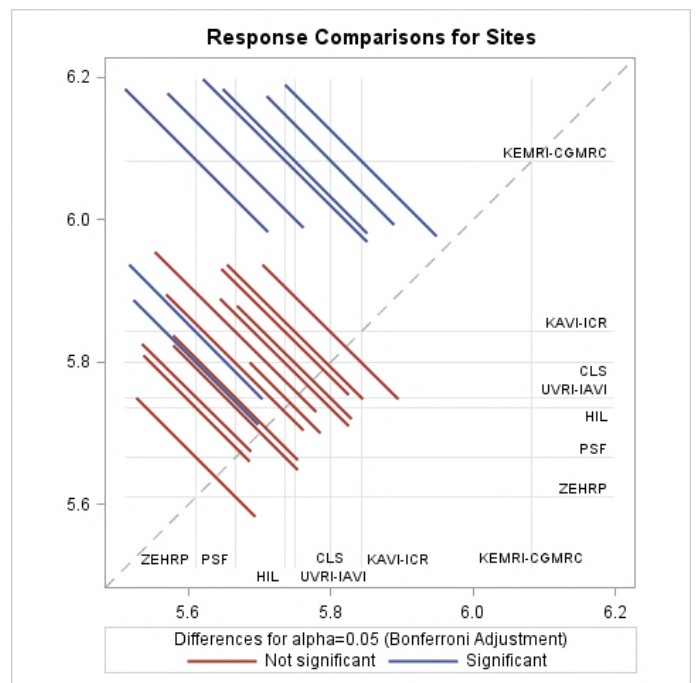

c. CMV

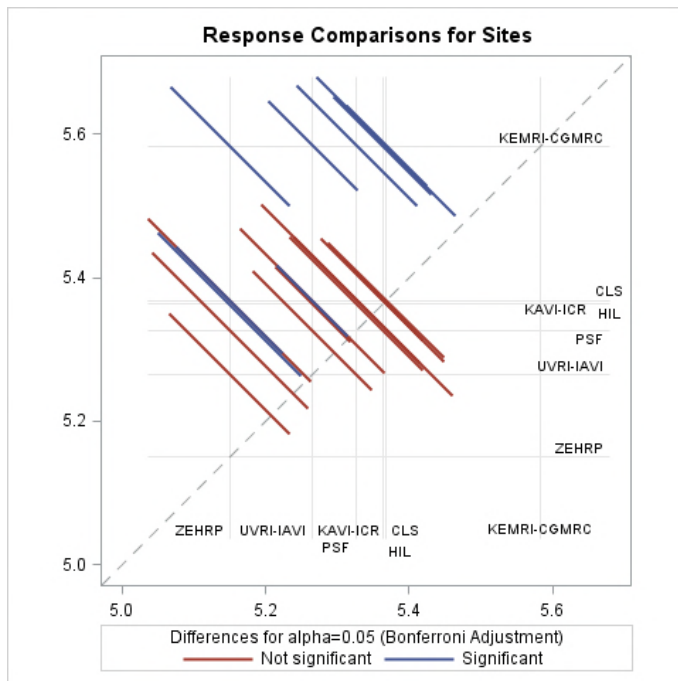

### Mock

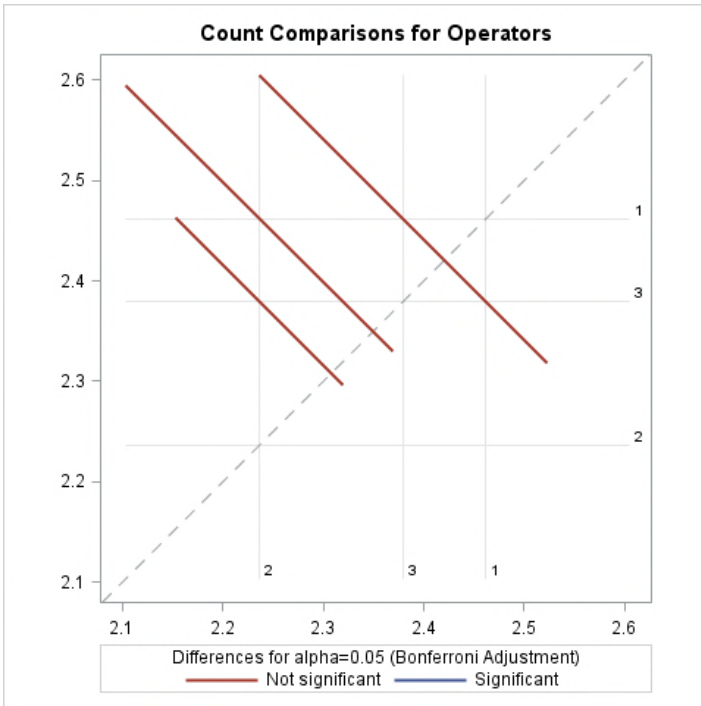

### CEF

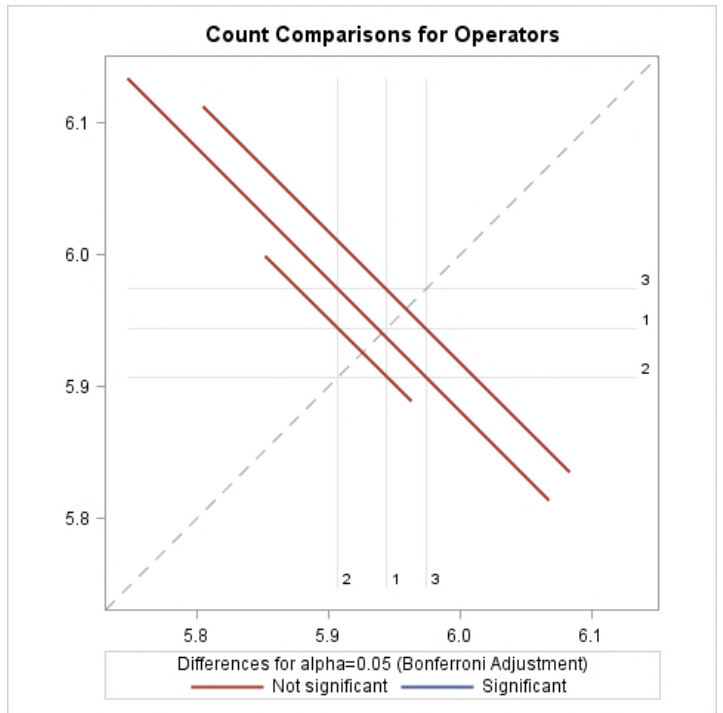

### CMV

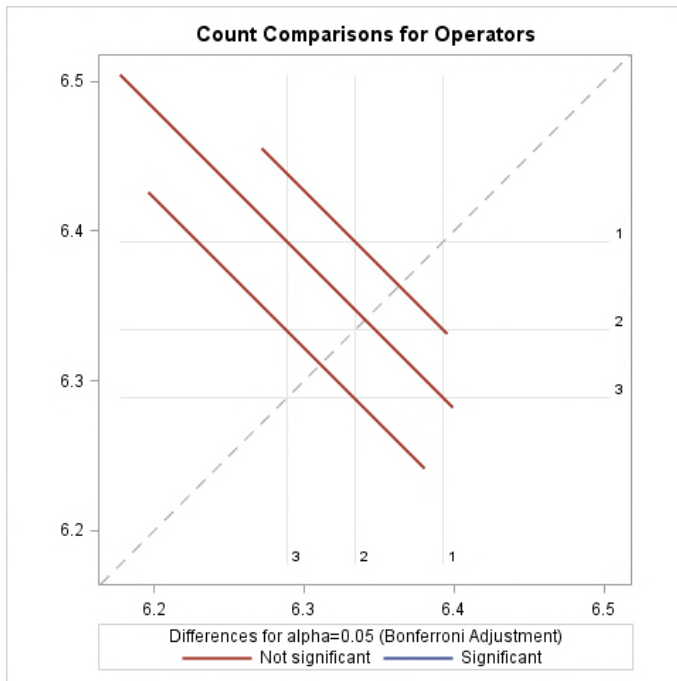



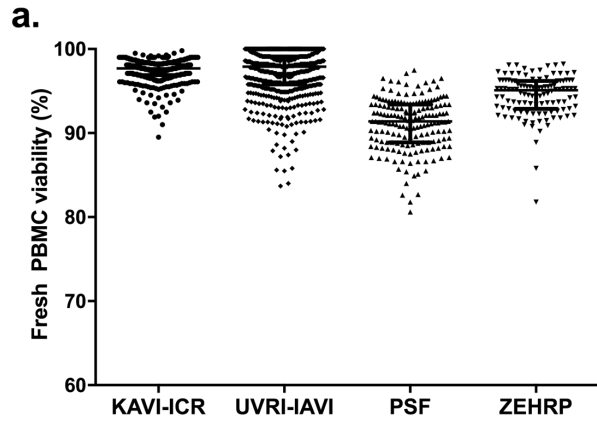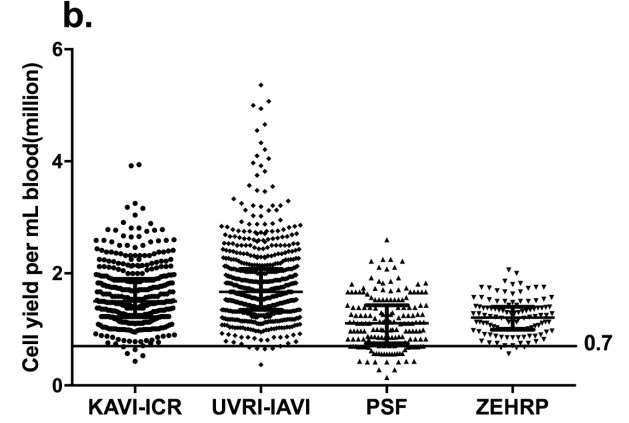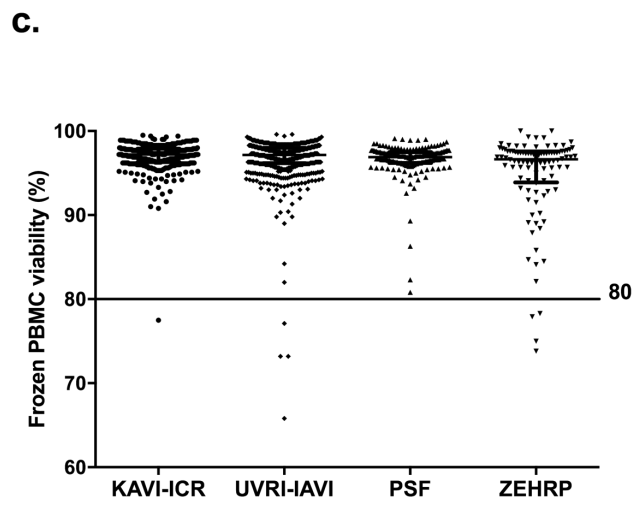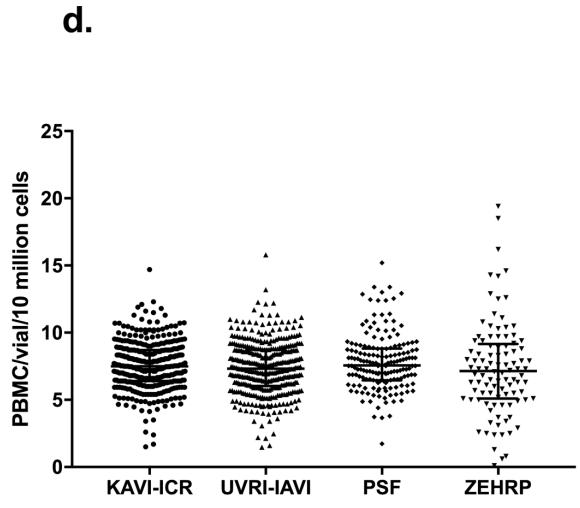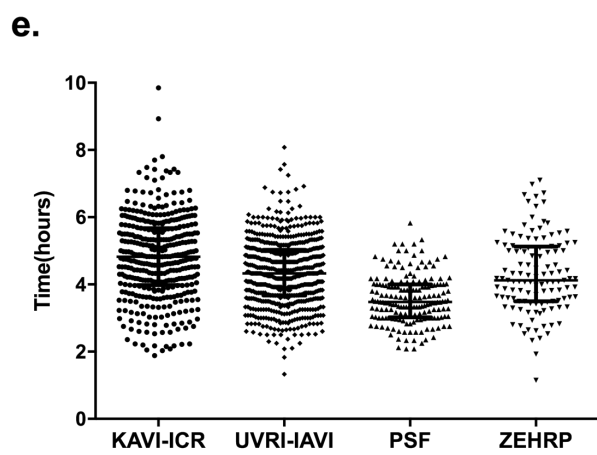

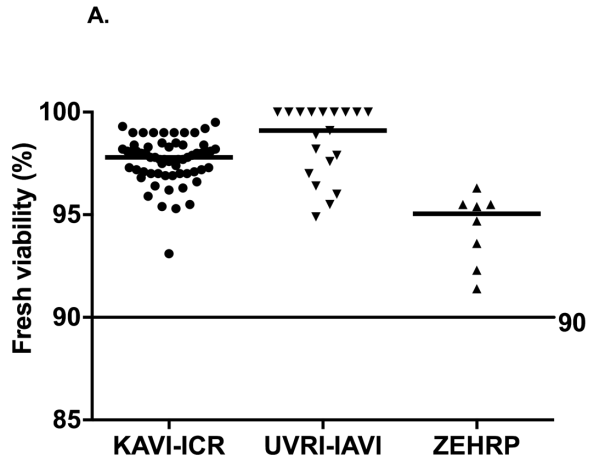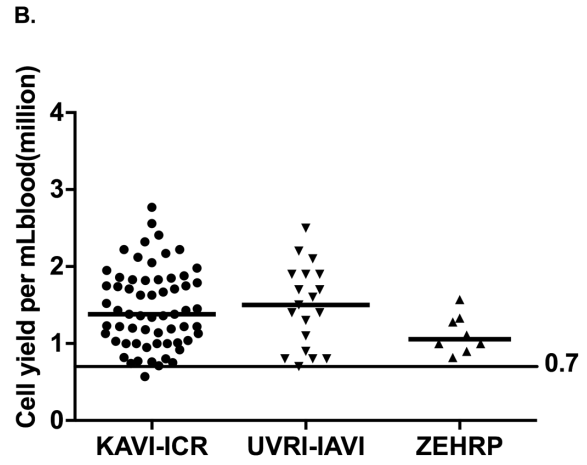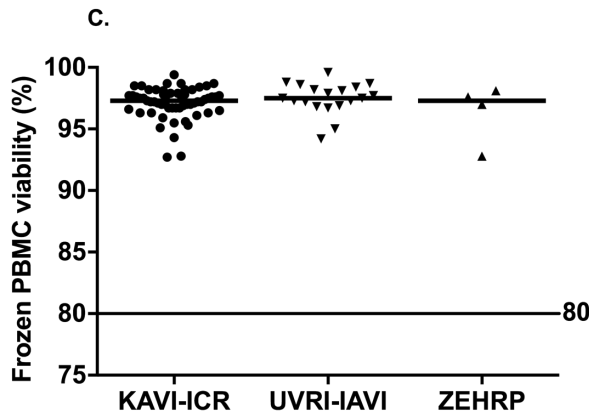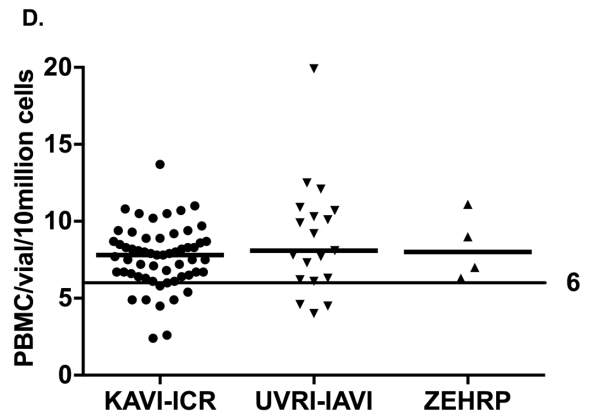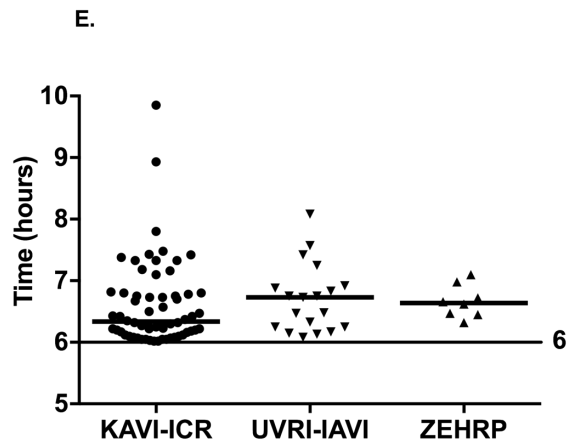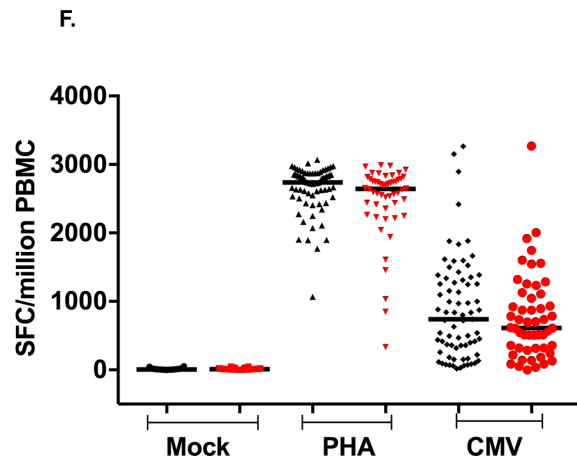

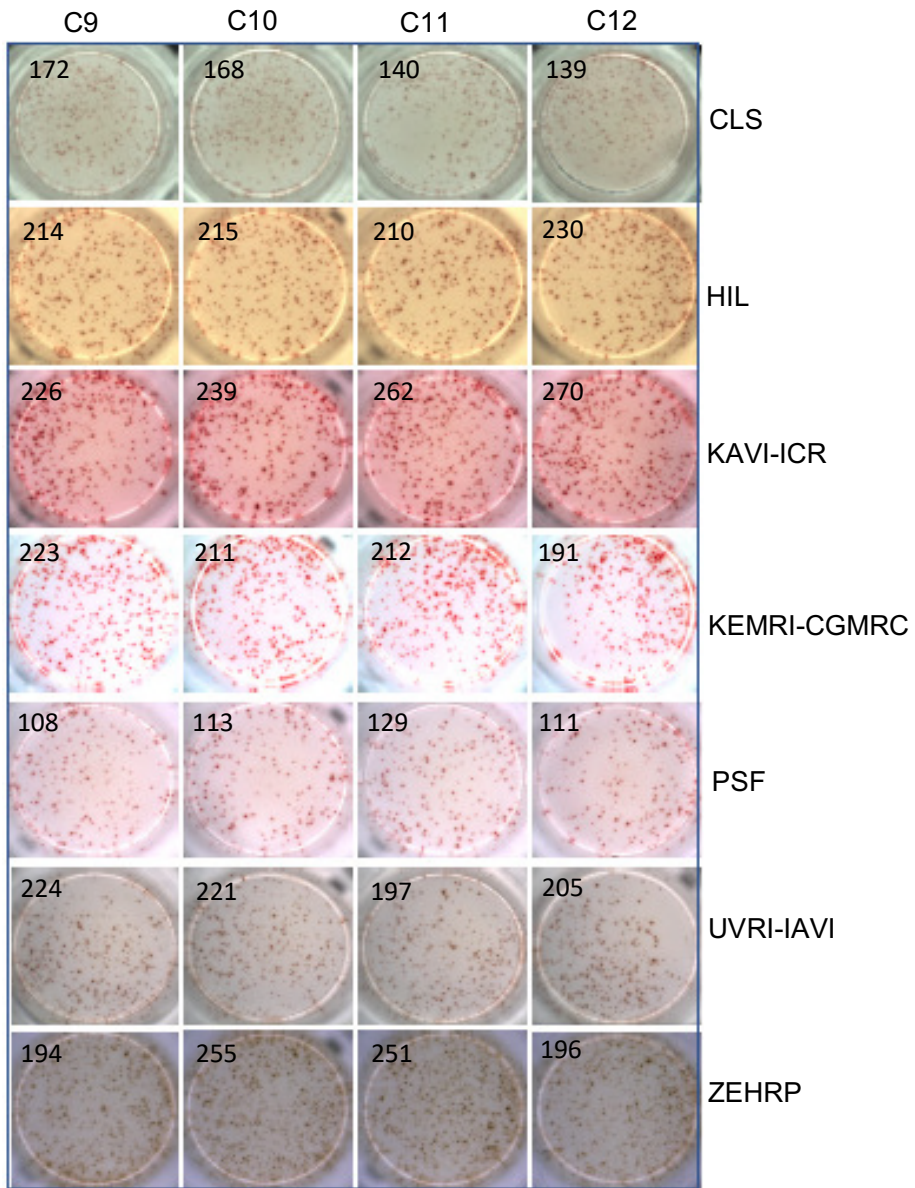

| <b>GCLP Guideline</b>                                       | <b>Process</b>                                                                                                                                    |
|-------------------------------------------------------------|---------------------------------------------------------------------------------------------------------------------------------------------------|
| Development and qualification of collaborating laboratories | Assessment of laboratories' needs, develop required infrastructure, transfer and qualification of assays                                          |
| Qualification and/or validation of equipment and assays     | Develop qualification and/or validation plans, generate data and review compared against pre-defined criteria                                     |
| Equipment service and maintenance                           | Develop calibration plans and document calibration and maintenance of all critical equipment                                                      |
| Development of essential documents                          | Development and review of SOPs and other supporting documents describing safety and immunogenicity assessments                                    |
| Reagent and consumable procurement                          | Critical reagents are purchased from approved vendors according to an approved standardised specification                                         |
| External Quality Assurance Program                          | Development of quality assessment program covering all safety testing parameters, processing, storage and shipment of PBMCs and the ELISpot assay |
| Training Program                                            | GCLP and technical trainings to ensure compliance with international standards for conducting clinical trials                                     |
| Evaluation and Accreditation                                | GCLP compliance and acceptable technical performance monitoring by a comprehensive audit programme                                                |
| On-going technology Transfer                                | Transferring of new assays and establishment of separate research programs                                                                        |
